# Supplementary material for: Transgenerational effects on development following microplastic exposure in Drosophila melanogaster
Source: PeerJ. 2021 May 7;9:e11369. doi: 10.7717/peerj.11369 (PMC8109007; doi:10.7717/peerj.11369)
Supplement: Supplemental Information 3 — Raw measurements for the duration of larval and pupal stage, infection survival, wing size, and fecundity. [file peerj-09-11369-s003.xlsx]

## Sheet: F1 time to 1st pupa an 1s adult
F1
Treatment	Tube	Days to 1st pupa	Days to 1st adult
PE	1	9	5
PE	2	8	5
PE	3	9	4
PE	4	9	5
PE	5	9	5
PE	6	9	4
PE	7	9	5
PE	8	9	4
PE	9	9	5
PE	10	9	4
PE	11	9	5
PE	12	8	6
PE	13	8	5
PE	14	9	5
PE	15	9	5
PE	16	9	5
PE	17	9	4
PE	18	9	5
PE	19	8	5
PE	20	9	5
PE	21	9	5
PE	22	9	5
PE	23	9	4
PE	24	9	5
PE	25	9	5
PE	26	8	5
PE	27	9	5
PE	28	9	5
PE	29	9	5
PE	30	8	6
PVC	1	9	5
PVC	2	9	5
PVC	3	9	5
PVC	4	9	5
PVC	5	9	5
PVC	6	9	5
PVC	7	8	5
PVC	8	9	4
PVC	9	9	5
PVC	10	8	5
PVC	11	9	5
PVC	12	10	4
PVC	13	8	5
PVC	14	10	4
PVC	15	9	5
PVC	16	9	4
PVC	17	9	5
PVC	18	9	5
PVC	19	9	5
PVC	20	9	5
PVC	21	9	5
PVC	22	9	5
PVC	23	9	5
PVC	24	9	5
PVC	25	9	5
PVC	26	9	5
PVC	27	9	4
PVC	28	8	5
PVC	29	8	5
PVC	30	9	4
control	1	9	5
control	2	9	5
control	3	9	5
control	4	9	5
control	5	9	5
control	6	9	5
control	7	9	5
control	8	9	5
control	9	9	5
control	10	10	4
control	11	9	5
control	12	9	5
control	13	8	5
control	14	8	5
control	15	9	5
control	16	10	4
control	17	9	5
control	18	9	5
control	19	9	5
control	20	9	5
control	21	9	5
control	22	9	5
control	23	9	5
control	24	9	5
control	25	9	5
control	26	9	5
control	27	9	5
control	28	9	5
control	29	9	5
control	30	9	5

## Sheet: F2 time to 1st pupa and adult
F2
Treatment+fly number	Tube	Days to 1st pupa	Days to 1st adult
Control1	Tube 1	8	4
Control2	Tube 1	9	5			blank cells	no data in that tube (either because there were no eggs laid of because the female escaped from the tube)
Control3	Tube 1	10	5
Control4	Tube 1	10	5
Control5	Tube 1	10	5
Control6	Tube 1	9	6
Control7	Tube 1	10	5
Control8	Tube 1	10	5
Control9	Tube 1	9	5
Control10	Tube 1
Control11	Tube 1	10
Control12	Tube 1	9	5
Control13	Tube 1	11	5
Control14	Tube 1
Control15	Tube 1
Control16	Tube 1
Control17	Tube 1	10	5
Control18	Tube 1	10	5
Control19	Tube 1	9	5
Control20	Tube 1	8	4
Control1	Tube 2	11	4
Control2	Tube 2	14	5
Control3	Tube 2	11	5
Control4	Tube 2
Control5	Tube 2
Control6	Tube 2	11	6
Control7	Tube 2
Control8	Tube 2
Control9	Tube 2	13	6
Control10	Tube 2
Control11	Tube 2	10	5
Control12	Tube 2	10	5
Control13	Tube 2
Control14	Tube 2
Control15	Tube 2
Control16	Tube 2
Control17	Tube 2	11	5
Control18	Tube 2	13	5
Control19	Tube 2
Control20	Tube 2
Control1	Tube 3	12	5
Control2	Tube 3	16	5
Control3	Tube 3	11	5
Control4	Tube 3
Control5	Tube 3
Control6	Tube 3	10	6
Control7	Tube 3
Control8	Tube 3
Control9	Tube 3
Control10	Tube 3
Control11	Tube 3	11	5
Control12	Tube 3
Control13	Tube 3
Control14	Tube 3
Control15	Tube 3
Control16	Tube 3	12	5
Control17	Tube 3	12	6
Control18	Tube 3	12	6
Control19	Tube 3
Control20	Tube 3
Control1	Tube 4	10	6
Control2	Tube 4
Control3	Tube 4	11	5
Control4	Tube 4
Control5	Tube 4
Control6	Tube 4	12	5
Control7	Tube 4
Control8	Tube 4
Control9	Tube 4	17	5
Control10	Tube 4	17	6
Control11	Tube 4	10	5
Control12	Tube 4
Control13	Tube 4	23	6
Control14	Tube 4
Control15	Tube 4
Control16	Tube 4	11	6
Control17	Tube 4	11	5
Control18	Tube 4	12	5
Control19	Tube 4
Control20	Tube 4
Control1	Tube 5
Control2	Tube 5
Control3	Tube 5	11	5
Control4	Tube 5	22	9
Control5	Tube 5
Control6	Tube 5	8	6
Control7	Tube 5
Control8	Tube 5
Control9	Tube 5
Control10	Tube 5
Control11	Tube 5	9	5
Control12	Tube 5
Control13	Tube 5
Control14	Tube 5
Control15	Tube 5
Control16	Tube 5	11	6
Control17	Tube 5
Control18	Tube 5
Control19	Tube 5
Control20	Tube 5
PE1	Tube 1
PE2	Tube 1	9	5
PE3	Tube 1	9	5
PE4	Tube 1	9	5
PE5	Tube 1
PE6	Tube 1	9	5
PE7	Tube 1	9	5
PE8	Tube 1
PE9	Tube 1	9	5
PE10	Tube 1	8	4
PE11	Tube 1
PE12	Tube 1
PE13	Tube 1	8	5
PE14	Tube 1	8	5
PE15	Tube 1	8	4
PE16	Tube 1	9	4
PE17	Tube 1
PE18	Tube 1	9	4
PE19	Tube 1	8	5
PE20	Tube 1	10	4
PE1	Tube 2	9	5
PE2	Tube 2	11	4
PE3	Tube 2	10	5
PE4	Tube 2	9	5
PE5	Tube 2	11	4
PE6	Tube 2
PE7	Tube 2	10	5
PE8	Tube 2
PE9	Tube 2	10	5
PE10	Tube 2	10	5
PE11	Tube 2
PE12	Tube 2
PE13	Tube 2	9	5
PE14	Tube 2	10	5
PE15	Tube 2	9	5
PE16	Tube 2	11	5
PE17	Tube 2	11	4
PE18	Tube 2	10	5
PE19	Tube 2	10	5
PE20	Tube 2	13	5
PE1	Tube 3	12	5
PE2	Tube 3
PE3	Tube 3	12	6
PE4	Tube 3	10	5
PE5	Tube 3
PE6	Tube 3
PE7	Tube 3	11	5
PE8	Tube 3
PE9	Tube 3	10	5
PE10	Tube 3	9	5
PE11	Tube 3
PE12	Tube 3
PE13	Tube 3	9	5
PE14	Tube 3	12	4
PE15	Tube 3	10	6
PE16	Tube 3	11	5
PE17	Tube 3	18	6
PE18	Tube 3	12	5
PE19	Tube 3	12	5
PE20	Tube 3	14	6
PE1	Tube 4	13	5
PE2	Tube 4	14	3
PE3	Tube 4	26	6
PE4	Tube 4	9	6
PE5	Tube 4	19	8
PE6	Tube 4
PE7	Tube 4	11	5
PE8	Tube 4
PE9	Tube 4	13	6
PE10	Tube 4	10	5
PE11	Tube 4
PE12	Tube 4
PE13	Tube 4	10	5
PE14	Tube 4	11	5
PE15	Tube 4
PE16	Tube 4
PE17	Tube 4	13	5
PE18	Tube 4
PE19	Tube 4	11	5
PE20	Tube 4	13	6
PE1	Tube 5	11	6
PE2	Tube 5	12	5
PE3	Tube 5	19	6
PE4	Tube 5	9	6
PE5	Tube 5	13	5
PE6	Tube 5
PE7	Tube 5	10	6
PE8	Tube 5
PE9	Tube 5
PE10	Tube 5	8	6
PE11	Tube 5
PE12	Tube 5
PE13	Tube 5	10	5
PE14	Tube 5
PE15	Tube 5	12	2
PE16	Tube 5
PE17	Tube 5
PE18	Tube 5
PE19	Tube 5
PE20	Tube 5
PVC1%1	Tube 1	11	5
PVC1%2	Tube 1	10	5
PVC1%3	Tube 1	9	5
PVC1%4	Tube 1	9	5
PVC1%5	Tube 1	9	5
PVC1%6	Tube 1
PVC1%7	Tube 1	9	5
PVC1%8	Tube 1
PVC1%9	Tube 1	9	5
PVC1%10	Tube 1
PVC1%11	Tube 1	9	4
PVC1%12	Tube 1	9	5
PVC1%13	Tube 1	9	5
PVC1%14	Tube 1	8	5
PVC1%15	Tube 1	10	4
PVC1%16	Tube 1
PVC1%17	Tube 1	9	5
PVC1%18	Tube 1
PVC1%19	Tube 1	11	5
PVC1%20	Tube 1	10	4
PVC1%1	Tube 2	11	5
PVC1%2	Tube 2
PVC1%3	Tube 2	11	4
PVC1%4	Tube 2	11	4
PVC1%5	Tube 2	16	4
PVC1%6	Tube 2	10	5
PVC1%7	Tube 2	12	5
PVC1%8	Tube 2	11	5
PVC1%9	Tube 2	11	5
PVC1%10	Tube 2
PVC1%11	Tube 2	11	4
PVC1%12	Tube 2	11	5
PVC1%13	Tube 2
PVC1%14	Tube 2
PVC1%15	Tube 2	10	5
PVC1%16	Tube 2
PVC1%17	Tube 2	12	5
PVC1%18	Tube 2
PVC1%19	Tube 2
PVC1%20	Tube 2	11	5
PVC1%1	Tube 3	11	5
PVC1%2	Tube 3
PVC1%3	Tube 3	10	6
PVC1%4	Tube 3	12	6
PVC1%5	Tube 3
PVC1%6	Tube 3	11	5
PVC1%7	Tube 3	12	6
PVC1%8	Tube 3
PVC1%9	Tube 3
PVC1%10	Tube 3	12	6
PVC1%11	Tube 3	13	5
PVC1%12	Tube 3	12	5
PVC1%13	Tube 3	12	6
PVC1%14	Tube 3
PVC1%15	Tube 3	12	6
PVC1%16	Tube 3
PVC1%17	Tube 3	13	6
PVC1%18	Tube 3
PVC1%19	Tube 3
PVC1%20	Tube 3	11	5
PVC1%1	Tube 4	10	5
PVC1%2	Tube 4	10	6
PVC1%3	Tube 4	11	5
PVC1%4	Tube 4
PVC1%5	Tube 4
PVC1%6	Tube 4	11	5
PVC1%7	Tube 4	13	5
PVC1%8	Tube 4
PVC1%9	Tube 4
PVC1%10	Tube 4
PVC1%11	Tube 4
PVC1%12	Tube 4
PVC1%13	Tube 4
PVC1%14	Tube 4
PVC1%15	Tube 4
PVC1%16	Tube 4
PVC1%17	Tube 4
PVC1%18	Tube 4
PVC1%19	Tube 4
PVC1%20	Tube 4	12	5
PVC1%1	Tube 5	10	6
PVC1%2	Tube 5
PVC1%3	Tube 5	10	6
PVC1%4	Tube 5
PVC1%5	Tube 5
PVC1%6	Tube 5
PVC1%7	Tube 5
PVC1%8	Tube 5
PVC1%9	Tube 5
PVC1%10	Tube 5	9	5
PVC1%11	Tube 5	10	6
PVC1%12	Tube 5
PVC1%13	Tube 5	10	5
PVC1%14	Tube 5
PVC1%15	Tube 5
PVC1%16	Tube 5
PVC1%17	Tube 5	10	5
PVC1%18	Tube 5
PVC1%19	Tube 5
PVC1%20	Tube 5
PVC4%1	Tube 1	8	4
PVC4%2	Tube 1
PVC4%3	Tube 1	8	4
PVC4%4	Tube 1	8	4
PVC4%5	Tube 1	8	4
PVC4%6	Tube 1
PVC4%7	Tube 1	8	5
PVC4%8	Tube 1	8	4
PVC4%9	Tube 1
PVC4%10	Tube 1	8	5
PVC4%11	Tube 1	8	5
PVC4%12	Tube 1	9	4
PVC4%13	Tube 1
PVC4%14	Tube 1	8	5
PVC4%15	Tube 1	8	4
PVC4%16	Tube 1	8	4
PVC4%17	Tube 1	8	4
PVC4%18	Tube 1	8	5
PVC4%19	Tube 1	8	5
PVC4%20	Tube 1	8	5
PVC4%1	Tube 2	10	4
PVC4%2	Tube 2	9	5
PVC4%3	Tube 2	8	5
PVC4%4	Tube 2	9	4
PVC4%5	Tube 2	9	5
PVC4%6	Tube 2
PVC4%7	Tube 2	9	5
PVC4%8	Tube 2	11	4
PVC4%9	Tube 2
PVC4%10	Tube 2	10	5
PVC4%11	Tube 2	10	5
PVC4%12	Tube 2	11	4
PVC4%13	Tube 2	10	5
PVC4%14	Tube 2	9	5
PVC4%15	Tube 2	9	5
PVC4%16	Tube 2	8	5
PVC4%17	Tube 2	8	5
PVC4%18	Tube 2	9	5
PVC4%19	Tube 2	10	5
PVC4%20	Tube 2	8	5
PVC4%1	Tube 3	9	5
PVC4%2	Tube 3
PVC4%3	Tube 3
PVC4%4	Tube 3
PVC4%5	Tube 3	9	5
PVC4%6	Tube 3
PVC4%7	Tube 3
PVC4%8	Tube 3	10	5
PVC4%9	Tube 3
PVC4%10	Tube 3
PVC4%11	Tube 3	12	4
PVC4%12	Tube 3	10	5
PVC4%13	Tube 3	12	12
PVC4%14	Tube 3	8	5
PVC4%15	Tube 3	9	5
PVC4%16	Tube 3	9	6
PVC4%17	Tube 3
PVC4%18	Tube 3
PVC4%19	Tube 3	9	5
PVC4%20	Tube 3	11	5
PVC4%1	Tube 4	10	5
PVC4%2	Tube 4
PVC4%3	Tube 4
PVC4%4	Tube 4
PVC4%5	Tube 4	9	5
PVC4%6	Tube 4
PVC4%7	Tube 4	10	5
PVC4%8	Tube 4	10	5
PVC4%9	Tube 4
PVC4%10	Tube 4
PVC4%11	Tube 4	9	6
PVC4%12	Tube 4	10	5
PVC4%13	Tube 4
PVC4%14	Tube 4	8	5
PVC4%15	Tube 4	10	5
PVC4%16	Tube 4	10	5
PVC4%17	Tube 4	22	5
PVC4%18	Tube 4	10	5
PVC4%19	Tube 4	10	5
PVC4%20	Tube 4	11	5
PVC4%1	Tube 5	10	5
PVC4%2	Tube 5
PVC4%3	Tube 5
PVC4%4	Tube 5
PVC4%5	Tube 5	8	5
PVC4%6	Tube 5
PVC4%7	Tube 5	10	5
PVC4%8	Tube 5	9	6
PVC4%9	Tube 5
PVC4%10	Tube 5	8	5
PVC4%11	Tube 5	8	5
PVC4%12	Tube 5
PVC4%13	Tube 5
PVC4%14	Tube 5
PVC4%15	Tube 5
PVC4%16	Tube 5	11	5
PVC4%17	Tube 5
PVC4%18	Tube 5	8	5
PVC4%19	Tube 5
PVC4%20	Tube 5	10	5

## Sheet: wing size F1 and F2
R Wing size (mm) F1							R Wing size (mm) F2
fly	CONTROL	PE	PVC1%	PVC4%			fly	CONTROL	PE	PVC1%	PVC4%
1	1.56	1.49	1.44	1.49			1	1.4	1.56	1.47	1.44
2	1.52	1.54	1.54	1.46			2	1.47	1.48	1.48	1.52
3	1.46	1.41	1.54	n/a			3	1.45	1.57	1.4	1.41		n/a	wing damaged so it could not be measured
4	1.5	1.47	1.46	1.53			4	1.49	1.49	1.4	1.47
5	n/a	1.53	1.41	1.52			5	1.51	1.5	1.48	1.37
6	1.49	1.49	1.42	1.48			6	1.48	1.53	1.49	1.36
7	1.48	1.43	1.48	1.56			7	1.48	1.55	1.49	1.42
8	1.54	1.54	1.48	1.49			8	1.47	1.55	1.46	1.44
9	1.54	1.46	1.55	1.52			9	1.44	1.58	1.5	1.42
10	1.56	1.54	1.47	1.59			10	1.51	1.57	1.41	1.4
11	1.51	1.52	1.48	n/a			11	1.56	1.55	1.41	1.43
12	1.49	1.5	1.48	1.55			12	1.47	1.53	n/a	1.41
13	1.5	1.53	1.43	1.52			13	1.51	n/a	1.52	1.43
14	1.5	1.52	1.48	1.41			14	1.52	1.52	1.45	1.53
15	1.41	1.44	1.54	1.38			15	1.5	1.57	1.46	1.47
16	1.53	1.46	1.51	1.51			16	1.42	1.49	1.5	1.35
17	n/a	1.55	1.5	1.55			17	1.5	1.59	1.45	1.43
18	1.5	1.48	1.48	1.49			18	1.55	1.48	1.51	1.36
19	1.48	1.48	1.54	1.49			19	1.52	1.5	1.45	1.41
20	1.55	1.56	1.45	1.52			20	1.47	1.54	1.31	1.47
21	1.49	1.54	1.48	1.49			21	1.52	1.56	1.37	1.49
22	1.42	1.54	1.47	1.62			22	1.46	1.55	1.43	1.52
23	1.48	1.49	1.53	1.48			23	1.54	1.58	1.43	1.5
24	1.47	1.5	1.56	1.54			24	1.46	1.58	1.39	1.37
25	1.51	1.52	1.55	1.49			25	1.42	1.54	1.39	n/a
26	1.46	1.51	1.47	1.53			26	1.56	1.53	1.41	1.5
27	n/a	1.45	1.54	1.52			27	1.53	1.49	1.44	n/a
28	1.41	1.52	1.45	1.56			28	1.52	n/a	1.44	1.36
29	1.5	1.54	1.52	1.43			29	1.53	n/a	1.47	1.43
30	1.49	1.54	1.5	1.45			30	1.56	1.5	1.49	1.26

## Sheet: F1 # larva and pupa
F1
date	tube	treatment	number of pupae	number of adults
230519	1	PE	0					0	no larvae/adults in the tube
230519	2	PE	1					blank	data not recorded for that particular date (as adults not emerged yet of counting for pupae already finished
230519	3	PE	0
230519	4	PE	0
230519	5	PE	0
230519	6	PE	0
230519	7	PE	0
230519	8	PE	0
230519	9	PE	0
230519	10	PE	0
230519	11	PE	0
230519	12	PE	1
230519	13	PE	1
230519	14	PE	0
230519	15	PE	0
230519	16	PE	0
230519	17	PE	0
230519	18	PE	0
230519	19	PE	1
230519	20	PE	0
230519	21	PE	0
230519	22	PE	0
230519	23	PE	0
230519	24	PE	0
230519	25	PE	0
230519	26	PE	1
230519	27	PE	0
230519	28	PE	0
230519	29	PE	0
230519	30	PE	1
240519	1	PE	12
240519	2	PE	10
240519	3	PE	15
240519	4	PE	12
240519	5	PE	11
240519	6	PE	11
240519	7	PE	10
240519	8	PE	17
240519	9	PE	4
240519	10	PE	8
240519	11	PE	6
240519	12	PE	8
240519	13	PE	5
240519	14	PE	11
240519	15	PE	6
240519	16	PE	1
240519	17	PE	4
240519	18	PE	5
240519	19	PE	2
240519	20	PE	10
240519	21	PE	3
240519	22	PE	2
240519	23	PE	11
240519	24	PE	2
240519	25	PE	2
240519	26	PE	2
240519	27	PE	7
240519	28	PE	2
240519	29	PE	7
240519	30	PE	7
250519	1	PE	15
250519	2	PE	6
250519	3	PE	1
250519	4	PE	13
250519	5	PE	17
250519	6	PE	7
250519	7	PE	4
250519	8	PE	7
250519	9	PE	27
250519	10	PE	19
250519	11	PE	5
250519	12	PE	10
250519	13	PE	0
250519	14	PE	10
250519	15	PE	5
250519	16	PE	28
250519	17	PE	18
250519	18	PE	22
250519	19	PE	16
250519	20	PE	3
250519	21	PE	19
250519	22	PE	25
250519	23	PE	1
250519	24	PE	14
250519	25	PE	14
250519	26	PE	10
250519	27	PE	3
250519	28	PE	15
250519	29	PE	4
250519	30	PE	7
260519	1	PE	2
260519	2	PE	1
260519	3	PE	0
260519	4	PE	0
260519	5	PE	1
260519	6	PE	1
260519	7	PE	2
260519	8	PE	1
260519	9	PE	13
260519	10	PE	1
260519	11	PE	0
260519	12	PE	0
260519	13	PE	0
260519	14	PE	2
260519	15	PE	0
260519	16	PE	7
260519	17	PE	1
260519	18	PE	14
260519	19	PE	7
260519	20	PE	0
260519	21	PE	5
260519	22	PE	8
260519	23	PE	1
260519	24	PE	11
260519	25	PE	4
260519	26	PE	1
260519	27	PE	0
260519	28	PE	8
260519	29	PE	0
260519	30	PE	1
270519	1	PE	0
270519	2	PE	1
270519	3	PE	1
270519	4	PE	0
270519	5	PE	0
270519	6	PE	1
270519	7	PE	0
270519	8	PE	1
270519	9	PE	3
270519	10	PE	0
270519	11	PE	1
270519	12	PE	0
270519	13	PE	0
270519	14	PE	0
270519	15	PE	0
270519	16	PE	1
270519	17	PE	1
270519	18	PE	2
270519	19	PE	1
270519	20	PE	0
270519	21	PE	2
270519	22	PE	1
270519	23	PE	0
270519	24	PE	3
270519	25	PE	0
270519	26	PE	1
270519	27	PE	0
270519	28	PE	0
270519	29	PE	0
270519	30	PE	1
280519	1	PE	0	0
280519	2	PE	0	1
280519	3	PE	1	4
280519	4	PE	0	0
280519	5	PE	0	0
280519	6	PE	0	3
280519	7	PE	0	0
280519	8	PE	0	1
280519	9	PE	2	0
280519	10	PE	0	1
280519	11	PE	0	0
280519	12	PE	0	0
280519	13	PE	0	2
280519	14	PE	0	0
280519	15	PE	0	0
280519	16	PE	0	0
280519	17	PE	1	1
280519	18	PE	0	0
280519	19	PE	1	1
280519	20	PE	0	0
280519	21	PE	1	0
280519	22	PE	0	0
280519	23	PE	0	1
280519	24	PE	0	0
280519	25	PE	0	0
280519	26	PE	1	1
280519	27	PE	1	0
280519	28	PE	1	0
280519	29	PE	0	0
280519	30	PE	0	0
290519	1	PE	0	16
290519	2	PE	0	13
290519	3	PE	0	11
290519	4	PE	0	19
290519	5	PE	0	20
290519	6	PE	0	13
290519	7	PE	0	10
290519	8	PE	0	19
290519	9	PE	0	11
290519	10	PE	0	12
290519	11	PE	0	7
290519	12	PE	0	9
290519	13	PE	0	4
290519	14	PE	0	13
290519	15	PE	0	6
290519	16	PE	0	6
290519	17	PE	0	4
290519	18	PE	0	5
290519	19	PE	0	5
290519	20	PE	0	10
290519	21	PE	0	4
290519	22	PE	0	2
290519	23	PE	0	11
290519	24	PE	1	5
290519	25	PE	0	3
290519	26	PE	0	3
290519	27	PE	0	7
290519	28	PE	1	3
290519	29	PE	0	7
290519	30	PE	0	7
300519	1	PE	0	11
300519	2	PE	0	4
300519	3	PE	0	2
300519	4	PE	0	6
300519	5	PE	0	8
300519	6	PE	0	2
300519	7	PE	0	4
300519	8	PE	0	5
300519	9	PE	1	24
300519	10	PE	1	13
300519	11	PE	0	4
300519	12	PE	0	10
300519	13	PE	0	0
300519	14	PE	0	7
300519	15	PE	0	4
300519	16	PE	0	19
300519	17	PE	0	15
300519	18	PE	0	25
300519	19	PE	0	14
300519	20	PE	0	3
300519	21	PE	0	16
300519	22	PE	1	27
300519	23	PE	0	0
300519	24	PE	0	16
300519	25	PE	0	13
300519	26	PE	0	9
300519	27	PE	0	3
300519	28	PE	0	16
300519	29	PE	0	4
300519	30	PE	0	8
310519	1	PE		2
310519	2	PE		2
310519	3	PE		0
310519	4	PE		0
310519	5	PE		0
310519	6	PE		0
310519	7	PE		2
310519	8	PE		0
310519	9	PE		7
310519	10	PE		2
310519	11	PE		1
310519	12	PE		0
310519	13	PE		0
310519	14	PE		3
310519	15	PE		0
310519	16	PE		9
310519	17	PE		4
310519	18	PE		11
310519	19	PE		5
310519	20	PE		0
310519	21	PE		7
310519	22	PE		8
310519	23	PE		1
310519	24	PE		8
310519	25	PE		2
310519	26	PE		0
310519	27	PE		0
310519	28	PE		6
310519	29	PE		0
310519	30	PE		0
10619	1	PE		0
10619	2	PE		0
10619	3	PE		1
10619	4	PE		0
10619	5	PE		0
10619	6	PE		1
10619	7	PE		0
10619	8	PE		0
10619	9	PE		3
10619	10	PE		0
10619	11	PE		0
10619	12	PE		0
10619	13	PE		0
10619	14	PE		0
10619	15	PE		0
10619	16	PE		2
10619	17	PE		0
10619	18	PE		1
10619	19	PE		1
10619	20	PE		0
10619	21	PE		0
10619	22	PE		0
10619	23	PE		0
10619	24	PE		1
10619	25	PE		1
10619	26	PE		1
10619	27	PE		0
10619	28	PE		0
10619	29	PE		0
10619	30	PE		1
20619	1	PE		0
20619	2	PE		0
20619	3	PE		0
20619	4	PE		0
20619	5	PE		0
20619	6	PE		0
20619	7	PE		0
20619	8	PE		0
20619	9	PE		2
20619	10	PE		0
20619	11	PE		0
20619	12	PE		0
20619	13	PE		0
20619	14	PE		0
20619	15	PE		0
20619	16	PE		0
20619	17	PE		0
20619	18	PE		0
20619	19	PE		0
20619	20	PE		0
20619	21	PE		0
20619	22	PE		0
20619	23	PE		0
20619	24	PE		1
20619	25	PE		0
20619	26	PE		0
20619	27	PE		1
20619	28	PE		1
20619	29	PE		0
20619	30	PE		0
30619	1	PE		0
30619	2	PE		0
30619	3	PE		0
30619	4	PE		0
30619	5	PE		0
30619	6	PE		0
30619	7	PE		0
30619	8	PE		0
30619	9	PE		0
30619	10	PE		0
30619	11	PE		0
30619	12	PE		0
30619	13	PE		0
30619	14	PE		0
30619	15	PE		0
30619	16	PE		1
30619	17	PE		0
30619	18	PE		0
30619	19	PE		0
30619	20	PE		0
30619	21	PE		0
30619	22	PE		1
30619	23	PE		0
30619	24	PE		0
30619	25	PE		0
30619	26	PE		0
30619	27	PE		0
30619	28	PE		0
30619	29	PE		0
30619	30	PE		0
40619	1	PE		0
40619	2	PE		0
40619	3	PE		0
40619	4	PE		0
40619	5	PE		0
40619	6	PE		0
40619	7	PE		0
40619	8	PE		0
40619	9	PE		0
40619	10	PE		0
40619	11	PE		0
40619	12	PE		0
40619	13	PE		0
40619	14	PE		0
40619	15	PE		0
40619	16	PE		0
40619	17	PE		0
40619	18	PE		0
40619	19	PE		0
40619	20	PE		0
40619	21	PE		1
40619	22	PE		1
40619	23	PE		0
40619	24	PE		0
40619	25	PE		0
40619	26	PE		0
40619	27	PE		0
40619	28	PE		0
40619	29	PE		0
40619	30	PE		0
50619	1	PE		0
50619	2	PE		0
50619	3	PE		0
50619	4	PE		0
50619	5	PE		1
50619	6	PE		0
50619	7	PE		0
50619	8	PE		0
50619	9	PE		0
50619	10	PE		0
50619	11	PE		0
50619	12	PE		0
50619	13	PE		0
50619	14	PE		0
50619	15	PE		0
50619	16	PE		0
50619	17	PE		0
50619	18	PE		0
50619	19	PE		0
50619	20	PE		0
50619	21	PE		0
50619	22	PE		0
50619	23	PE		0
50619	24	PE		0
50619	25	PE		0
50619	26	PE		0
50619	27	PE		0
50619	28	PE		0
50619	29	PE		0
50619	30	PE		0
60619	1	PE		0
60619	2	PE		0
60619	3	PE		0
60619	4	PE		0
60619	5	PE		0
60619	6	PE		0
60619	7	PE		0
60619	8	PE		0
60619	9	PE		0
60619	10	PE		0
60619	11	PE		0
60619	12	PE		0
60619	13	PE		0
60619	14	PE		0
60619	15	PE		0
60619	16	PE		0
60619	17	PE		0
60619	18	PE		0
60619	19	PE		0
60619	20	PE		0
60619	21	PE		0
60619	22	PE		0
60619	23	PE		0
60619	24	PE		0
60619	25	PE		0
60619	26	PE		0
60619	27	PE		0
60619	28	PE		0
60619	29	PE		0
60619	30	PE		0
230519	1	PVC	0
230519	2	PVC	0
230519	3	PVC	0
230519	4	PVC	0
230519	5	PVC	0
230519	6	PVC	0
230519	7	PVC	1
230519	8	PVC	0
230519	9	PVC	0
230519	10	PVC	2
230519	11	PVC	0
230519	12	PVC	0
230519	13	PVC	1
230519	14	PVC	0
230519	15	PVC	0
230519	16	PVC	0
230519	17	PVC	0
230519	18	PVC	0
230519	19	PVC	0
230519	20	PVC	0
230519	21	PVC	0
230519	22	PVC	0
230519	23	PVC	0
230519	24	PVC	0
230519	25	PVC	0
230519	26	PVC	0
230519	27	PVC	0
230519	28	PVC	1
230519	29	PVC	1
230519	30	PVC	0
240519	1	PVC	5
240519	2	PVC	8
240519	3	PVC	10
240519	4	PVC	6
240519	5	PVC	9
240519	6	PVC	9
240519	7	PVC	9
240519	8	PVC	12
240519	9	PVC	9
240519	10	PVC	13
240519	11	PVC	3
240519	12	PVC	0
240519	13	PVC	9
240519	14	PVC	0
240519	15	PVC	6
240519	16	PVC	10
240519	17	PVC	5
240519	18	PVC	7
240519	19	PVC	6
240519	20	PVC	14
240519	21	PVC	13
240519	22	PVC	2
240519	23	PVC	8
240519	24	PVC	4
240519	25	PVC	9
240519	26	PVC	9
240519	27	PVC	11
240519	28	PVC	6
240519	29	PVC	5
240519	30	PVC	10
250519	1	PVC	13
250519	2	PVC	8
250519	3	PVC	5
250519	4	PVC	19
250519	5	PVC	4
250519	6	PVC	12
250519	7	PVC	1
250519	8	PVC	9
250519	9	PVC	13
250519	10	PVC	10
250519	11	PVC	17
250519	12	PVC	21
250519	13	PVC	2
250519	14	PVC	29
250519	15	PVC	11
250519	16	PVC	3
250519	17	PVC	16
250519	18	PVC	18
250519	19	PVC	12
250519	20	PVC	13
250519	21	PVC	1
250519	22	PVC	18
250519	23	PVC	5
250519	24	PVC	16
250519	25	PVC	0
250519	26	PVC	8
250519	27	PVC	8
250519	28	PVC	11
250519	29	PVC	20
250519	30	PVC	22
260519	1	PVC	7
260519	2	PVC	7
260519	3	PVC	0
260519	4	PVC	1
260519	5	PVC	1
260519	6	PVC	1
260519	7	PVC	1
260519	8	PVC	4
260519	9	PVC	1
260519	10	PVC	2
260519	11	PVC	6
260519	12	PVC	11
260519	13	PVC	0
260519	14	PVC	2
260519	15	PVC	1
260519	16	PVC	0
260519	17	PVC	0
260519	18	PVC	9
260519	19	PVC	4
260519	20	PVC	1
260519	21	PVC	1
260519	22	PVC	6
260519	23	PVC	1
260519	24	PVC	0
260519	25	PVC	0
260519	26	PVC	1
260519	27	PVC	2
260519	28	PVC	5
260519	29	PVC	2
260519	30	PVC	7
270519	1	PVC	2
270519	2	PVC	0
270519	3	PVC	0
270519	4	PVC	1
270519	5	PVC	1
270519	6	PVC	0
270519	7	PVC	0
270519	8	PVC	0
270519	9	PVC	2
270519	10	PVC	0
270519	11	PVC	0
270519	12	PVC	2
270519	13	PVC	0
270519	14	PVC	2
270519	15	PVC	2
270519	16	PVC	0
270519	17	PVC	1
270519	18	PVC	1
270519	19	PVC	1
270519	20	PVC	0
270519	21	PVC	1
270519	22	PVC	0
270519	23	PVC	0
270519	24	PVC	1
270519	25	PVC	0
270519	26	PVC	0
270519	27	PVC	1
270519	28	PVC	2
270519	29	PVC	1
270519	30	PVC	0
280519	1	PVC	0	0
280519	2	PVC	0	0
280519	3	PVC	0	0
280519	4	PVC	1	0
280519	5	PVC	0	0
280519	6	PVC	0	0
280519	7	PVC	0	2
280519	8	PVC	0	1
280519	9	PVC	0	0
280519	10	PVC	0	2
280519	11	PVC	0	0
280519	12	PVC	0	0
280519	13	PVC	0	1
280519	14	PVC	0	0
280519	15	PVC	0	0
280519	16	PVC	0	2
280519	17	PVC	0	0
280519	18	PVC	0	0
280519	19	PVC	0	0
280519	20	PVC	0	0
280519	21	PVC	0	0
280519	22	PVC	0	0
280519	23	PVC	0	0
280519	24	PVC	0	0
280519	25	PVC	1	0
280519	26	PVC	0	0
280519	27	PVC	0	1
280519	28	PVC	1	1
280519	29	PVC	0	1
280519	30	PVC	1	1
290519	1	PVC	0	5
290519	2	PVC	0	10
290519	3	PVC	0	13
290519	4	PVC	0	11
290519	5	PVC	0	10
290519	6	PVC	0	9
290519	7	PVC	0	8
290519	8	PVC	0	13
290519	9	PVC	0	13
290519	10	PVC	0	16
290519	11	PVC	0	4
290519	12	PVC	0	1
290519	13	PVC	0	8
290519	14	PVC	0	4
290519	15	PVC	0	6
290519	16	PVC	0	10
290519	17	PVC	1	9
290519	18	PVC	0	6
290519	19	PVC	0	8
290519	20	PVC	0	17
290519	21	PVC	0	10
290519	22	PVC	0	1
290519	23	PVC	1	8
290519	24	PVC	1	5
290519	25	PVC	0	8
290519	26	PVC	0	10
290519	27	PVC	0	12
290519	28	PVC	0	7
290519	29	PVC	0	3
290519	30	PVC	0	12
300519	1	PVC	0	15
300519	2	PVC	0	7
300519	3	PVC	0	2
300519	4	PVC	0	15
300519	5	PVC	0	2
300519	6	PVC	0	12
300519	7	PVC	0	2
300519	8	PVC	0	7
300519	9	PVC	0	11
300519	10	PVC	0	7
300519	11	PVC	0	16
300519	12	PVC	0	19
300519	13	PVC	0	3
300519	14	PVC	0	22
300519	15	PVC	0	11
300519	16	PVC	0	1
300519	17	PVC	0	10
300519	18	PVC	0	22
300519	19	PVC	0	12
300519	20	PVC	0	10
300519	21	PVC	0	4
300519	22	PVC	0	19
300519	23	PVC	0	5
300519	24	PVC	0	15
300519	25	PVC	0	1
300519	26	PVC	0	6
300519	27	PVC	1	7
300519	28	PVC	0	10
300519	29	PVC	0	22
300519	30	PVC	0	18
310519	1	PVC		5
310519	2	PVC		7
310519	3	PVC		0
310519	4	PVC		1
310519	5	PVC		2
310519	6	PVC		1
310519	7	PVC		0
310519	8	PVC		3
310519	9	PVC		1
310519	10	PVC		1
310519	11	PVC		6
310519	12	PVC		13
310519	13	PVC		0
310519	14	PVC		5
310519	15	PVC		1
310519	16	PVC		0
310519	17	PVC		1
310519	18	PVC		6
310519	19	PVC		1
310519	20	PVC		0
310519	21	PVC		1
310519	22	PVC		5
310519	23	PVC		1
310519	24	PVC		0
310519	25	PVC		0
310519	26	PVC		2
310519	27	PVC		2
310519	28	PVC		4
310519	29	PVC		2
310519	30	PVC		0
10619	1	PVC		1
10619	2	PVC		0
10619	3	PVC		0
10619	4	PVC		0
10619	5	PVC		0
10619	6	PVC		0
10619	7	PVC		0
10619	8	PVC		0
10619	9	PVC		0
10619	10	PVC		0
10619	11	PVC		0
10619	12	PVC		0
10619	13	PVC		0
10619	14	PVC		1
10619	15	PVC		1
10619	16	PVC		0
10619	17	PVC		0
10619	18	PVC		0
10619	19	PVC		1
10619	20	PVC		0
10619	21	PVC		1
10619	22	PVC		1
10619	23	PVC		0
10619	24	PVC		1
10619	25	PVC		0
10619	26	PVC		0
10619	27	PVC		0
10619	28	PVC		2
10619	29	PVC		1
10619	30	PVC		1
20619	1	PVC		1
20619	2	PVC		0
20619	3	PVC		0
20619	4	PVC		1
20619	5	PVC		0
20619	6	PVC		0
20619	7	PVC		0
20619	8	PVC		0
20619	9	PVC		0
20619	10	PVC		1
20619	11	PVC		0
20619	12	PVC		0
20619	13	PVC		0
20619	14	PVC		0
20619	15	PVC		0
20619	16	PVC		0
20619	17	PVC		0
20619	18	PVC		0
20619	19	PVC		0
20619	20	PVC		0
20619	21	PVC		0
20619	22	PVC		0
20619	23	PVC		0
20619	24	PVC		0
20619	25	PVC		0
20619	26	PVC		0
20619	27	PVC		0
20619	28	PVC		1
20619	29	PVC		0
20619	30	PVC		0
30619	1	PVC		0
30619	2	PVC		0
30619	3	PVC		0
30619	4	PVC		0
30619	5	PVC		0
30619	6	PVC		0
30619	7	PVC		0
30619	8	PVC		0
30619	9	PVC		0
30619	10	PVC		0
30619	11	PVC		0
30619	12	PVC		0
30619	13	PVC		0
30619	14	PVC		0
30619	15	PVC		0
30619	16	PVC		0
30619	17	PVC		1
30619	18	PVC		0
30619	19	PVC		0
30619	20	PVC		0
30619	21	PVC		0
30619	22	PVC		0
30619	23	PVC		1
30619	24	PVC		0
30619	25	PVC		0
30619	26	PVC		0
30619	27	PVC		0
30619	28	PVC		0
30619	29	PVC		0
30619	30	PVC		0
40619	1	PVC		0
40619	2	PVC		0
40619	3	PVC		0
40619	4	PVC		0
40619	5	PVC		0
40619	6	PVC		1
40619	7	PVC		0
40619	8	PVC		0
40619	9	PVC		0
40619	10	PVC		0
40619	11	PVC		0
40619	12	PVC		0
40619	13	PVC		0
40619	14	PVC		0
40619	15	PVC		0
40619	16	PVC		0
40619	17	PVC		0
40619	18	PVC		0
40619	19	PVC		0
40619	20	PVC		0
40619	21	PVC		0
40619	22	PVC		0
40619	23	PVC		0
40619	24	PVC		0
40619	25	PVC		0
40619	26	PVC		0
40619	27	PVC		1
40619	28	PVC		0
40619	29	PVC		0
40619	30	PVC		0
50619	1	PVC		0
50619	2	PVC		0
50619	3	PVC		0
50619	4	PVC		0
50619	5	PVC		0
50619	6	PVC		0
50619	7	PVC		0
50619	8	PVC		0
50619	9	PVC		0
50619	10	PVC		0
50619	11	PVC		0
50619	12	PVC		0
50619	13	PVC		0
50619	14	PVC		0
50619	15	PVC		0
50619	16	PVC		0
50619	17	PVC		1
50619	18	PVC		0
50619	19	PVC		0
50619	20	PVC		0
50619	21	PVC		0
50619	22	PVC		0
50619	23	PVC		0
50619	24	PVC		0
50619	25	PVC		0
50619	26	PVC		0
50619	27	PVC		0
50619	28	PVC		0
50619	29	PVC		0
50619	30	PVC		0
60619	1	PVC		0
60619	2	PVC		0
60619	3	PVC		0
60619	4	PVC		0
60619	5	PVC		0
60619	6	PVC		1
60619	7	PVC		0
60619	8	PVC		0
60619	9	PVC		0
60619	10	PVC		0
60619	11	PVC		0
60619	12	PVC		0
60619	13	PVC		0
60619	14	PVC		0
60619	15	PVC		0
60619	16	PVC		0
60619	17	PVC		0
60619	18	PVC		0
60619	19	PVC		0
60619	20	PVC		0
60619	21	PVC		0
60619	22	PVC		0
60619	23	PVC		0
60619	24	PVC		0
60619	25	PVC		0
60619	26	PVC		0
60619	27	PVC		0
60619	28	PVC		0
60619	29	PVC		0
60619	30	PVC		0
230519	1	Control	0
230519	2	Control	0
230519	3	Control	0
230519	4	Control	0
230519	5	Control	0
230519	6	Control	0
230519	7	Control	0
230519	8	Control	0
230519	9	Control	0
230519	10	Control	0
230519	11	Control	0
230519	12	Control	0
230519	13	Control	1
230519	14	Control	1
230519	15	Control	0
230519	16	Control	0
230519	17	Control	0
230519	18	Control	0
230519	19	Control	0
230519	20	Control	0
230519	21	Control	0
230519	22	Control	0
230519	23	Control	0
230519	24	Control	0
230519	25	Control	0
230519	26	Control	0
230519	27	Control	0
230519	28	Control	0
230519	29	Control	0
230519	30	Control	0
240519	1	Control	18
240519	2	Control	4
240519	3	Control	3
240519	4	Control	8
240519	5	Control	12
240519	6	Control	7
240519	7	Control	9
240519	8	Control	8
240519	9	Control	11
240519	10	Control	0
240519	11	Control	6
240519	12	Control	8
240519	13	Control	13
240519	14	Control	5
240519	15	Control	3
240519	16	Control	0
240519	17	Control	1
240519	18	Control	5
240519	19	Control	4
240519	20	Control	8
240519	21	Control	5
240519	22	Control	4
240519	23	Control	5
240519	24	Control	2
240519	25	Control	2
240519	26	Control	1
240519	27	Control	7
240519	28	Control	2
240519	29	Control	2
240519	30	Control	6
250519	1	Control	7
250519	2	Control	15
250519	3	Control	1
250519	4	Control	41
250519	5	Control	22
250519	6	Control	19
250519	7	Control	12
250519	8	Control	4
250519	9	Control	15
250519	10	Control	16
250519	11	Control	15
250519	12	Control	1
250519	13	Control	10
250519	14	Control	5
250519	15	Control	18
250519	16	Control	24
250519	17	Control	19
250519	18	Control	17
250519	19	Control	4
250519	20	Control	17
250519	21	Control	19
250519	22	Control	21
250519	23	Control	5
250519	24	Control	15
250519	25	Control	22
250519	26	Control	28
250519	27	Control	10
250519	28	Control	18
250519	29	Control	22
250519	30	Control	2
260519	1	Control	1
260519	2	Control	3
260519	3	Control	0
260519	4	Control	8
260519	5	Control	0
260519	6	Control	2
260519	7	Control	5
260519	8	Control	3
260519	9	Control	0
260519	10	Control	13
260519	11	Control	0
260519	12	Control	0
260519	13	Control	0
260519	14	Control	1
260519	15	Control	2
260519	16	Control	10
260519	17	Control	35
260519	18	Control	6
260519	19	Control	0
260519	20	Control	2
260519	21	Control	4
260519	22	Control	12
260519	23	Control	2
260519	24	Control	4
260519	25	Control	3
260519	26	Control	10
260519	27	Control	3
260519	28	Control	12
260519	29	Control	6
260519	30	Control	0
270519	1	Control	0
270519	2	Control	0
270519	3	Control	0
270519	4	Control	3
270519	5	Control	1
270519	6	Control	0
270519	7	Control	0
270519	8	Control	0
270519	9	Control	0
270519	10	Control	2
270519	11	Control	2
270519	12	Control	0
270519	13	Control	1
270519	14	Control	0
270519	15	Control	0
270519	16	Control	2
270519	17	Control	8
270519	18	Control	2
270519	19	Control	0
270519	20	Control	2
270519	21	Control	2
270519	22	Control	1
270519	23	Control	0
270519	24	Control	1
270519	25	Control	0
270519	26	Control	2
270519	27	Control	0
270519	28	Control	1
270519	29	Control	2
270519	30	Control	0
280519	1	Control	0	0
280519	2	Control	0	0
280519	3	Control	0	0
280519	4	Control	0	0
280519	5	Control	1	0
280519	6	Control	1	0
280519	7	Control	0	0
280519	8	Control	0	0
280519	9	Control	1	0
280519	10	Control	0	0
280519	11	Control	0	0
280519	12	Control	0	0
280519	13	Control	0	2
280519	14	Control	0	1
280519	15	Control	2	0
280519	16	Control	1	0
280519	17	Control	2	0
280519	18	Control	0	0
280519	19	Control	0	0
280519	20	Control	1	0
280519	21	Control	0	0
280519	22	Control	1	0
280519	23	Control	0	0
280519	24	Control	0	0
280519	25	Control	1	0
280519	26	Control	2	0
280519	27	Control	0	0
280519	28	Control	1	0
280519	29	Control	0	0
280519	30	Control	0	0
290519	1	Control	0	19
290519	2	Control	0	4
290519	3	Control	0	3
290519	4	Control	1	9
290519	5	Control	0	12
290519	6	Control	0	7
290519	7	Control	0	8
290519	8	Control	0	7
290519	9	Control	0	10
290519	10	Control	0	2
290519	11	Control	0	3
290519	12	Control	0	9
290519	13	Control	0	12
290519	14	Control	0	3
290519	15	Control	0	2
290519	16	Control	1	2
290519	17	Control	1	1
290519	18	Control	0	4
290519	19	Control	0	2
290519	20	Control	0	11
290519	21	Control	0	2
290519	22	Control	1	2
290519	23	Control	0	4
290519	24	Control	0	4
290519	25	Control	0	2
290519	26	Control	0	1
290519	27	Control	1	3
290519	28	Control	0	3
290519	29	Control	0	3
290519	30	Control	0	4
300519	1	Control	0	7
300519	2	Control	0	14
300519	3	Control	0	1
300519	4	Control	0	39
300519	5	Control	0	22
300519	6	Control	0	20
300519	7	Control	0	13
300519	8	Control	0	5
300519	9	Control	0	16
300519	10	Control	0	17
300519	11	Control	0	18
300519	12	Control	0	1
300519	13	Control	0	8
300519	14	Control	0	8
300519	15	Control	0	16
300519	16	Control	0	17
300519	17	Control	1	17
300519	18	Control	0	20
300519	19	Control	0	6
300519	20	Control	0	13
300519	21	Control	0	18
300519	22	Control	0	19
300519	23	Control	0	6
300519	24	Control	0	14
300519	25	Control	0	19
300519	26	Control	0	22
300519	27	Control	0	12
300519	28	Control	0	15
300519	29	Control	0	19
300519	30	Control	0	4
310519	1	Control		1
310519	2	Control		4
310519	3	Control		0
310519	4	Control		7
310519	5	Control		1
310519	6	Control		2
310519	7	Control		5
310519	8	Control		4
310519	9	Control		0
310519	10	Control		9
310519	11	Control		0
310519	12	Control		0
310519	13	Control		2
310519	14	Control		0
310519	15	Control		4
310519	16	Control		14
310519	17	Control		34
310519	18	Control		4
310519	19	Control		0
310519	20	Control		5
310519	21	Control		8
310519	22	Control		15
310519	23	Control		0
310519	24	Control		5
310519	25	Control		7
310519	26	Control		13
310519	27	Control		2
310519	28	Control		11
310519	29	Control		7
310519	30	Control		0
10619	1	Control		0
10619	2	Control		0
10619	3	Control		0
10619	4	Control		3
10619	5	Control		0
10619	6	Control		0
10619	7	Control		0
10619	8	Control		0
10619	9	Control		0
10619	10	Control		2
10619	11	Control		1
10619	12	Control		0
10619	13	Control		1
10619	14	Control		0
10619	15	Control		0
10619	16	Control		2
10619	17	Control		9
10619	18	Control		1
10619	19	Control		0
10619	20	Control		0
10619	21	Control		0
10619	22	Control		1
10619	23	Control		2
10619	24	Control		2
10619	25	Control		0
10619	26	Control		5
10619	27	Control		3
10619	28	Control		2
10619	29	Control		1
10619	30	Control		0
20619	1	Control		0
20619	2	Control		0
20619	3	Control		0
20619	4	Control		1
20619	5	Control		0
20619	6	Control		0
20619	7	Control		0
20619	8	Control		0
20619	9	Control		0
20619	10	Control		0
20619	11	Control		0
20619	12	Control		0
20619	13	Control		0
20619	14	Control		0
20619	15	Control		0
20619	16	Control		1
20619	17	Control		4
20619	18	Control		0
20619	19	Control		0
20619	20	Control		0
20619	21	Control		0
20619	22	Control		1
20619	23	Control		0
20619	24	Control		0
20619	25	Control		1
20619	26	Control		1
20619	27	Control		0
20619	28	Control		2
20619	29	Control		1
20619	30	Control		0
30619	1	Control		0
30619	2	Control		0
30619	3	Control		0
30619	4	Control		0
30619	5	Control		0
30619	6	Control		0
30619	7	Control		0
30619	8	Control		0
30619	9	Control		1
30619	10	Control		0
30619	11	Control		0
30619	12	Control		0
30619	13	Control		0
30619	14	Control		0
30619	15	Control		1
30619	16	Control		1
30619	17	Control		1
30619	18	Control		0
30619	19	Control		0
30619	20	Control		0
30619	21	Control		0
30619	22	Control		1
30619	23	Control		0
30619	24	Control		0
30619	25	Control		0
30619	26	Control		0
30619	27	Control		0
30619	28	Control		0
30619	29	Control		0
30619	30	Control		0
40619	1	Control		0
40619	2	Control		0
40619	3	Control		0
40619	4	Control		0
40619	5	Control		0
40619	6	Control		0
40619	7	Control		0
40619	8	Control		0
40619	9	Control		0
40619	10	Control		0
40619	11	Control		0
40619	12	Control		0
40619	13	Control		0
40619	14	Control		0
40619	15	Control		0
40619	16	Control		0
40619	17	Control		1
40619	18	Control		0
40619	19	Control		0
40619	20	Control		1
40619	21	Control		0
40619	22	Control		0
40619	23	Control		0
40619	24	Control		0
40619	25	Control		0
40619	26	Control		0
40619	27	Control		0
40619	28	Control		0
40619	29	Control		0
40619	30	Control		0
50619	1	Control		0
50619	2	Control		0
50619	3	Control		0
50619	4	Control		0
50619	5	Control		0
50619	6	Control		0
50619	7	Control		0
50619	8	Control		0
50619	9	Control		0
50619	10	Control		0
50619	11	Control		0
50619	12	Control		0
50619	13	Control		0
50619	14	Control		0
50619	15	Control		1
50619	16	Control		0
50619	17	Control		0
50619	18	Control		0
50619	19	Control		0
50619	20	Control		0
50619	21	Control		0
50619	22	Control		0
50619	23	Control		0
50619	24	Control		0
50619	25	Control		0
50619	26	Control		0
50619	27	Control		0
50619	28	Control		0
50619	29	Control		0
50619	30	Control		0
60619	1	Control		0
60619	2	Control		0
60619	3	Control		0
60619	4	Control		0
60619	5	Control		0
60619	6	Control		0
60619	7	Control		0
60619	8	Control		0
60619	9	Control		0
60619	10	Control		0
60619	11	Control		0
60619	12	Control		0
60619	13	Control		0
60619	14	Control		0
60619	15	Control		0
60619	16	Control		0
60619	17	Control		1
60619	18	Control		0
60619	19	Control		0
60619	20	Control		0
60619	21	Control		0
60619	22	Control		0
60619	23	Control		0
60619	24	Control		0
60619	25	Control		0
60619	26	Control		0
60619	27	Control		1
60619	28	Control		0
60619	29	Control		0
60619	30	Control		0

## Sheet: F2 male female
F2
		number of females	number of males	sex not determined
Control1	Tube 1	7	8	0				0	no animals in that category
Control2	Tube 1	2	6	0				n/a	female had escaped from that tube so no data was available
Control3	Tube 1	9	12	0
Control4	Tube 1	14	13	0
Control5	Tube 1	9	13	1				sex not determined were flies that had been trapped in the food and sex could not be determined
Control6	Tube 1	10	11	4
Control7	Tube 1	9	8	0
Control8	Tube 1	0	1	0
Control9	Tube 1	0	0	6
Control10	Tube 1	0	0	0
Control11	Tube 1	n/a	n/a	n/a
Control12	Tube 1	5	7	0
Control13	Tube 1	2	4	5
Control14	Tube 1	0	0	0
Control15	Tube 1	0	0	0
Control16	Tube 1	0	0	0
Control17	Tube 1	11	10	0
Control18	Tube 1	4	0	0
Control19	Tube 1	7	9	0
Control20	Tube 1	0	1	0
Control1	Tube 2	9	10	0
Control2	Tube 2	3	3	0
Control3	Tube 2	8	8	1
Control4	Tube 2	0	0	0
Control5	Tube 2	0	0	0
Control6	Tube 2	6	5	0
Control7	Tube 2	0	0	0
Control8	Tube 2	0	0	0
Control9	Tube 2	1	1	0
Control10	Tube 2	0	0	0
Control11	Tube 2	4	2	0
Control12	Tube 2	0	4	0
Control13	Tube 2	0	0	0
Control14	Tube 2	n/a	n/a	n/a
Control15	Tube 2	0	0	0
Control16	Tube 2	0	0	0
Control17	Tube 2	11	14	0
Control18	Tube 2	8	4	0
Control19	Tube 2	0	0	0
Control20	Tube 2	0	0	0
Control1	Tube 3	5	6	0
Control2	Tube 3	1	0	0
Control3	Tube 3	4	3	0
Control4	Tube 3	0	0	0
Control5	Tube 3	0	0	0
Control6	Tube 3	3	2	0
Control7	Tube 3	0	0	0
Control8	Tube 3	0	0	0
Control9	Tube 3	0	0	0
Control10	Tube 3	0	0	0
Control11	Tube 3	3	4	1
Control12	Tube 3	0	0	0
Control13	Tube 3	0	0	0
Control14	Tube 3	n/a	n/a	n/a
Control15	Tube 3	0	0	0
Control16	Tube 3	1	2	1
Control17	Tube 3	10	8	0
Control18	Tube 3	3	4	0
Control19	Tube 3	0	0	0
Control20	Tube 3	n/a	n/a	n/a
Control1	Tube 4	1	1	3
Control2	Tube 4	0	0	0
Control3	Tube 4	5	12	0
Control4	Tube 4	0	0	0
Control5	Tube 4	0	0	0
Control6	Tube 4	1	1	0
Control7	Tube 4	0	0	0
Control8	Tube 4	0	0	0
Control9	Tube 4	0	1	0
Control10	Tube 4	0	2	0
Control11	Tube 4	4	6	0
Control12	Tube 4	0	0	0
Control13	Tube 4	0	1	0
Control14	Tube 4	n/a	n/a	n/a
Control15	Tube 4	n/a	n/a	n/a
Control16	Tube 4	11	2	0
Control17	Tube 4	9	5	0
Control18	Tube 4	11	5	1
Control19	Tube 4	0	0	0
Control20	Tube 4	n/a	n/a	n/a
Control1	Tube 5	0	0	0
Control2	Tube 5	0	0	0
Control3	Tube 5	13	5	0
Control4	Tube 5	0	1	0
Control5	Tube 5	0	0	0
Control6	Tube 5	1	3	0
Control7	Tube 5	0	0	0
Control8	Tube 5	0	0	0
Control9	Tube 5	0	0	0
Control10	Tube 5	0	0	0
Control11	Tube 5	1	1	0
Control12	Tube 5	0	0	0
Control13	Tube 5	0	0	0
Control14	Tube 5	n/a	n/a	n/a
Control15	Tube 5	n/a	n/a	n/a
Control16	Tube 5	2	2	0
Control17	Tube 5	0	0	0
Control18	Tube 5	0	0	0
Control19	Tube 5	0	0	0
Control20	Tube 5	n/a	n/a	n/a
PE1	Tube 1	0	0	0
PE2	Tube 1	8	11	0
PE3	Tube 1	10	9	0
PE4	Tube 1	7	11	0
PE5	Tube 1	0	0	0
PE6	Tube 1	1	2	1
PE7	Tube 1	16	17	0
PE8	Tube 1	0	0	0
PE9	Tube 1	13	11	0
PE10	Tube 1	17	13	0
PE11	Tube 1	0	0	0
PE12	Tube 1	0	0	0
PE13	Tube 1	16	18	0
PE14	Tube 1	5	6	0
PE15	Tube 1	11	19	1
PE16	Tube 1	13	4	2
PE17	Tube 1	0	0	0
PE18	Tube 1	11	6	1
PE19	Tube 1	6	10	2
PE20	Tube 1	8	14	0
PE1	Tube 2	1	1	0
PE2	Tube 2	4	2	0
PE3	Tube 2	10	6	0
PE4	Tube 2	7	8	0
PE5	Tube 2	14	13	0
PE6	Tube 2	0	0	0
PE7	Tube 2	12	9	0
PE8	Tube 2	n/a	n/a	n/a
PE9	Tube 2	9	8	0
PE10	Tube 2	8	11	0
PE11	Tube 2	0	0	0
PE12	Tube 2	0	0	0
PE13	Tube 2	8	9	0
PE14	Tube 2	15	7	0
PE15	Tube 2	9	11	1
PE16	Tube 2	17	0	0
PE17	Tube 2	11	17	0
PE18	Tube 2	3	4	0
PE19	Tube 2	6	4	2
PE20	Tube 2	0	1	0
PE1	Tube 3	1	1	0
PE2	Tube 3	0	0	0
PE3	Tube 3	0	4	0
PE4	Tube 3	3	0	0
PE5	Tube 3	0	0	0
PE6	Tube 3	0	0	0
PE7	Tube 3	3	6	0
PE8	Tube 3	n/a	n/a	n/a
PE9	Tube 3	3	2	2
PE10	Tube 3	10	11	0
PE11	Tube 3	n/a	n/a	n/a
PE12	Tube 3	n/a	n/a	n/a
PE13	Tube 3	5	1	0
PE14	Tube 3	1	1	0
PE15	Tube 3	1	0	0
PE16	Tube 3	5	0	0
PE17	Tube 3	2	7	0
PE18	Tube 3	12	4	0
PE19	Tube 3	2	5	0
PE20	Tube 3	7	5	0
PE1	Tube 4	1	4	1
PE2	Tube 4	2	2	0
PE3	Tube 4	1	0	0
PE4	Tube 4	3	5	0
PE5	Tube 4	3	6	0
PE6	Tube 4	0	0	0
PE7	Tube 4	12	9	0
PE8	Tube 4	n/a	n/a	n/a
PE9	Tube 4	4	6	0
PE10	Tube 4	4	6	0
PE11	Tube 4	n/a	n/a	n/a
PE12	Tube 4	n/a	n/a	n/a
PE13	Tube 4	1	3	0
PE14	Tube 4	2	0	0
PE15	Tube 4	0	0	0
PE16	Tube 4	0	0	0
PE17	Tube 4	13	7	0
PE18	Tube 4	0	0	0
PE19	Tube 4	1	0	5
PE20	Tube 4	7	7	0
PE1	Tube 5	1	2	0
PE2	Tube 5	0	1	0
PE3	Tube 5	1	2	0
PE4	Tube 5	6	8	0
PE5	Tube 5	5	4	0
PE6	Tube 5	0	0	0
PE7	Tube 5	5	8	0
PE8	Tube 5	n/a	n/a	n/a
PE9	Tube 5	0	0	0
PE10	Tube 5	3	7	0
PE11	Tube 5	n/a	n/a	n/a
PE12	Tube 5	n/a	n/a	n/a
PE13	Tube 5	2	1	0
PE14	Tube 5	0	0	0
PE15	Tube 5	2	2	0
PE16	Tube 5	0	0	0
PE17	Tube 5	0	0	0
PE18	Tube 5	0	0	0
PE19	Tube 5	0	0	0
PE20	Tube 5	0	0	0
PVC1%1	Tube 1	0	1	0
PVC1%2	Tube 1	2	0	0
PVC1%3	Tube 1	10	15	0
PVC1%4	Tube 1	1	3	0
PVC1%5	Tube 1	3	2	0
PVC1%6	Tube 1	0	0	0
PVC1%7	Tube 1	2	2	0
PVC1%8	Tube 1	0	0	0
PVC1%9	Tube 1	0	1	0
PVC1%10	Tube 1	0	0	0
PVC1%11	Tube 1	3	2	0
PVC1%12	Tube 1	6	7	0
PVC1%13	Tube 1	10	8	0
PVC1%14	Tube 1	0	1	0
PVC1%15	Tube 1	2	0	0
PVC1%16	Tube 1	0	0	0
PVC1%17	Tube 1	5	6	0
PVC1%18	Tube 1	0	0	0
PVC1%19	Tube 1	0	1	0
PVC1%20	Tube 1	15	14	0
PVC1%1	Tube 2	6	2	1
PVC1%2	Tube 2	0	0	0
PVC1%3	Tube 2	3	6	0
PVC1%4	Tube 2	2	0	0
PVC1%5	Tube 2	3	4	0
PVC1%6	Tube 2	17	20	0
PVC1%7	Tube 2	1	1	0
PVC1%8	Tube 2	0	1	0
PVC1%9	Tube 2	1	4	2
PVC1%10	Tube 2	0	0	0
PVC1%11	Tube 2	15	10	0
PVC1%12	Tube 2	2	8	2
PVC1%13	Tube 2	0	0	0
PVC1%14	Tube 2	0	0	0
PVC1%15	Tube 2	2	2	4
PVC1%16	Tube 2	0	0	0
PVC1%17	Tube 2	3	5	0
PVC1%18	Tube 2	n/a	n/a	n/a
PVC1%19	Tube 2	0	0	0
PVC1%20	Tube 2	7	12	0
PVC1%1	Tube 3	0	0	3
PVC1%2	Tube 3	0	0	0
PVC1%3	Tube 3	9	8	1
PVC1%4	Tube 3	2	0	0
PVC1%5	Tube 3	0	0	0
PVC1%6	Tube 3	2	2	0
PVC1%7	Tube 3	0	0	0
PVC1%8	Tube 3	0	0	0
PVC1%9	Tube 3	0	0	0
PVC1%10	Tube 3	6	0	0
PVC1%11	Tube 3	19	11	0
PVC1%12	Tube 3	0	1	0
PVC1%13	Tube 3	5	3	0
PVC1%14	Tube 3	0	0	0
PVC1%15	Tube 3	1	0	0
PVC1%16	Tube 3	0	0	0
PVC1%17	Tube 3	2	5	0
PVC1%18	Tube 3	n/a	n/a	n/a
PVC1%19	Tube 3	0	0	0
PVC1%20	Tube 3	0	3	0
PVC1%1	Tube 4	0	2	0
PVC1%2	Tube 4	2	0	0
PVC1%3	Tube 4	10	17	0
PVC1%4	Tube 4	0	0	0
PVC1%5	Tube 4	0	0	0
PVC1%6	Tube 4	2	0	0
PVC1%7	Tube 4	0	0	0
PVC1%8	Tube 4	0	0	0
PVC1%9	Tube 4	gap	gap	gap
PVC1%10	Tube 4	gap	gap	gap
PVC1%11	Tube 4	gap	gap	gap
PVC1%12	Tube 4	gap	gap	gap
PVC1%13	Tube 4	gap	gap	gap
PVC1%14	Tube 4	gap	gap	gap
PVC1%15	Tube 4	gap	gap	gap
PVC1%16	Tube 4	gap	gap	gap
PVC1%17	Tube 4	gap	gap	gap
PVC1%18	Tube 4	n/a	n/a	n/a
PVC1%19	Tube 4	0	0	0
PVC1%20	Tube 4	5	1	0
PVC1%1	Tube 5	0	1	0
PVC1%2	Tube 5	n/a	n/a	n/a
PVC1%3	Tube 5	6	11	2
PVC1%4	Tube 5	0	0	0
PVC1%5	Tube 5	0	0	0
PVC1%6	Tube 5	0	0	0
PVC1%7	Tube 5	0	0	0
PVC1%8	Tube 5	0	0	0
PVC1%9	Tube 5	0	0	0
PVC1%10	Tube 5	15	8	0
PVC1%11	Tube 5	9	15	0
PVC1%12	Tube 5	0	0	0
PVC1%13	Tube 5	17	7	1
PVC1%14	Tube 5	0	0	0
PVC1%15	Tube 5	0	0	0
PVC1%16	Tube 5	0	0	0
PVC1%17	Tube 5	1	2	0
PVC1%18	Tube 5	n/a	n/a	n/a
PVC1%19	Tube 5	0	0	0
PVC1%20	Tube 5	0	0	0
PVC4%1	Tube 1	11	9	0
PVC4%2	Tube 1	0	0	0
PVC4%3	Tube 1	3	2	0
PVC4%4	Tube 1	2	5	0
PVC4%5	Tube 1	10	9	0
PVC4%6	Tube 1	0	0	0
PVC4%7	Tube 1	8	8	2
PVC4%8	Tube 1	4	3	3
PVC4%9	Tube 1	0	0	0
PVC4%10	Tube 1	1	4	0
PVC4%11	Tube 1	6	11	1
PVC4%12	Tube 1	15	11	0
PVC4%13	Tube 1	0	0	0
PVC4%14	Tube 1	2	4	0
PVC4%15	Tube 1	5	6	3
PVC4%16	Tube 1	8	12	3
PVC4%17	Tube 1	17	16	0
PVC4%18	Tube 1	1	2	0
PVC4%19	Tube 1	10	10	0
PVC4%20	Tube 1	7	15	0
PVC4%1	Tube 2	12	10	0
PVC4%2	Tube 2	0	1	0
PVC4%3	Tube 2	2	4	0
PVC4%4	Tube 2	3	3	0
PVC4%5	Tube 2	4	5	1
PVC4%6	Tube 2	0	0	0
PVC4%7	Tube 2	4	9	1
PVC4%8	Tube 2	7	10	2
PVC4%9	Tube 2	0	0	0
PVC4%10	Tube 2	6	4	0
PVC4%11	Tube 2	13	11	0
PVC4%12	Tube 2	15	11	0
PVC4%13	Tube 2	11	7	0
PVC4%14	Tube 2	3	6	4
PVC4%15	Tube 2	1	5	0
PVC4%16	Tube 2	5	10	0
PVC4%17	Tube 2	4	7	0
PVC4%18	Tube 2	1	0	0
PVC4%19	Tube 2	9	6
PVC4%20	Tube 2	10	6	0
PVC4%1	Tube 3	9	6	0
PVC4%2	Tube 3	0	0	0
PVC4%3	Tube 3	0	0	0
PVC4%4	Tube 3	0	0	0
PVC4%5	Tube 3	3	3	0
PVC4%6	Tube 3	0	0	0
PVC4%7	Tube 3	0	0	0
PVC4%8	Tube 3	2	3	7
PVC4%9	Tube 3	0	0	0
PVC4%10	Tube 3	0	0	0
PVC4%11	Tube 3	5	6	2
PVC4%12	Tube 3	10	15	0
PVC4%13	Tube 3	0	1	0
PVC4%14	Tube 3	1	6	1
PVC4%15	Tube 3	5	2	0
PVC4%16	Tube 3	1	2	0
PVC4%17	Tube 3	0	0	0
PVC4%18	Tube 3	0	0	0
PVC4%19	Tube 3	4	7	1
PVC4%20	Tube 3	0	3	0
PVC4%1	Tube 4	4	7	0
PVC4%2	Tube 4	0	0	0
PVC4%3	Tube 4	0	0	0
PVC4%4	Tube 4	0	0	0
PVC4%5	Tube 4	5	4	1
PVC4%6	Tube 4	0	0	0
PVC4%7	Tube 4	9	4	0
PVC4%8	Tube 4	10	3	0
PVC4%9	Tube 4	0	0	0
PVC4%10	Tube 4	0	0	0
PVC4%11	Tube 4	2	3	0
PVC4%12	Tube 4	6	7	6
PVC4%13	Tube 4	0	0	0
PVC4%14	Tube 4	6	2	0
PVC4%15	Tube 4	2	3	0
PVC4%16	Tube 4	7	4	0
PVC4%17	Tube 4	1	0	0
PVC4%18	Tube 4	1	1	0
PVC4%19	Tube 4	1	0	0
PVC4%20	Tube 4	1	0	0
PVC4%1	Tube 5	10	7	0
PVC4%2	Tube 5	0	0	0
PVC4%3	Tube 5	0	0	0
PVC4%4	Tube 5	0	0	0
PVC4%5	Tube 5	1	2	0
PVC4%6	Tube 5	0	0	0
PVC4%7	Tube 5	10	7	0
PVC4%8	Tube 5	5	10	0
PVC4%9	Tube 5	0	0	0
PVC4%10	Tube 5	5	2	0
PVC4%11	Tube 5	6	11	0
PVC4%12	Tube 5	0	0	0
PVC4%13	Tube 5	0	0	0
PVC4%14	Tube 5	0	0	0
PVC4%15	Tube 5	0	0	0
PVC4%16	Tube 5	2	4	0
PVC4%17	Tube 5	0	0	0
PVC4%18	Tube 5	3	3	0
PVC4%19	Tube 5	0	0	0
PVC4%20	Tube 5	4	3	0

## Sheet: virus survival (accumulative)
ACCUMULATIVE
time	13.20	13.30	12.45	12.30	12.55	12.20	12.17	12.35	12.10	12.35	12.30	13.00	12.15	13.55	14.05	14	12.30	19.15	14.40	14.35	14.20	17.10
day	5.6.19	6.6.19	7.6.19	8.6.19	9.6.19	10.6.19	11.6.19	12.6.19	13.6.19	14.6.19	15.6.19	16.6.19	17.6.19	18.6.19	19.6.19	20.6.19	21.6.19	22.6.19	23.6.19	24.6.19	25.6.19	26.6.19
Tube
control- c1	10	10	10	10	10	10	10	10	10	10	10	10	10	10	10	10	10	10	10	10	10	10
control- c2	10	10	10	10	10	10	10	10	10	10	10	10	10	10	10	10	10	10	10	10	10	10
control- c3	10	10	10	10	10	10	10	10	10	10	10	10	10	10	10	10	10	10	10	10	10	10
control- c4	10	10	10	10	10	10	10	10	10	10	10	10	10	10	10	10	10	10	10	10	10	10
control- c5	10	10	10	10	10	10	10	10	10	10	10	10	10	10	10	10	10	10	10	10	10	10
control- c6	10	10	10	10	10	10	10	10	10	10	10	10	10	10	10	10	10	10	10	10	10	10
control- jab1	10	10	10	10	10	10	10	10	10	10	10	10	10	10	10	10	10	10	10	10	10	10
control- jab2	10	10	10	10	10	10	10	10	10	10	10	10	10	10	10	10	10	10	9	9	9	9
control- jab3	10	10	10	10	10	10	10	10	10	10	10	10	10	10	10	10	10	10	10	10	10	10
control- jab4	10	10	10	10	10	10	10	10	10	10	10	10	10	10	10	10	10	10	10	10	10	10
control- jab5	10	10	10	10	10	10	10	10	10	10	10	10	10	10	10	10	10	10	10	10	10	10
control- jab6	9	9	9	9	9	9	9	9	9	9	9	9	9	9	9	9	9	9	9	9	9	9
control- virus1	10	10	10	10	9	8	6	4	3	3	1	0	0	0	0	0	0	0	0	0	0	0
control- virus2	10	10	10	10	10	8	3	2	2	1	1	0	0	0	0	0	0	0	0	0	0	0
control- virus3	10	10	10	10	9	7	6	5	3	2	2	2	2	2	2	2	2	2	2	2	2	2
control- virus4	10	10	10	10	10	8	6	5	4	2	1	0	0	0	0	0	0	0	0	0	0	0
control- virus5	11	11	11	11	10	7	4	2	2	2	2	0	0	0	0	0	0	0	0	0	0	0
control- virus6	10	10	10	10	10	7	4	3	1	1	1	0	0	0	0	0	0	0	0	0	0	0
PE- c1	10	10	10	10	10	10	10	10	10	10	10	10	10	10	10	10	10	10	10	10	10	10
PE- c2	10	10	10	10	10	10	10	10	10	10	10	10	10	10	9	9	9	9	9	9	9	9
PE- c3	10	10	10	10	10	10	10	10	10	10	10	10	10	9	9	9	9	9	9	9	9	9
PE- c4	10	10	10	10	10	10	10	10	10	10	10	10	10	10	10	10	10	10	10	10	10	10
PE- c5	10	10	10	10	10	10	10	10	10	10	10	10	10	10	10	10	10	10	10	10	10	10
PE- c6	10	10	10	10	10	10	10	10	10	10	10	10	10	10	10	10	10	10	10	10	10	10
PE- jab1	10	10	10	10	10	10	10	10	10	10	10	10	10	10	10	10	10	10	10	10	10	10
PE- jab2	10	10	10	10	10	10	10	10	10	10	10	10	10	10	10	10	10	10	10	10	10	10
PE- jab3	10	10	10	10	10	10	10	10	10	10	10	10	10	10	10	10	10	9	9	9	9	9
PE- jab4	10	10	10	10	10	10	10	10	10	10	10	10	10	10	10	10	10	10	10	10	10	10
PE- jab5	10	10	10	10	10	10	10	10	10	10	10	10	10	10	10	10	10	10	10	10	10	10
PE- jab6	10	10	10	10	10	10	10	10	10	10	10	10	10	10	10	10	10	10	10	10	8	8
PE- virus1	10	10	10	10	10	9	6	5	2	1	1	0	0	0	0	0	0	0	0	0	0	0
PE- virus2	10	10	10	10	10	9	5	4	3	3	3	1	1	1	1	1	1	1	1	1	1	1
PE- virus3	11	11	11	11	9	7	6	5	4	2	0	0	0	0	0	0	0	0	0	0	0	0
PE- virus4	10	10	10	10	9	6	6	5	2	2	2	1	0	0	0	0	0	0	0	0	0	0
PE- virus5	11	11	11	11	11	10	7	5	2	2	2	2	0	0	0	0	0	0	0	0	0	0
PE- virus6	10	10	10	10	10	9	9	6	6	5	2	1	1	1	1	0	0	0	0	0	0	0
PVC1%- c1	10	10	10	10	10	10	10	10	10	10	10	10	10	10	10	10	10	10	10	10	10	10
PVC1%- c2	10	10	10	10	10	10	10	10	10	10	10	10	10	10	10	10	10	10	10	10	9	9
PVC1%- c3	10	10	10	10	9	9	8	8	8	8	8	8	8	8	8	8	8	8	8	8	8	8
PVC1%- c4	10	10	10	10	10	10	10	10	10	10	10	10	10	10	10	10	10	10	10	10	10	10
PVC1%- c5	10	10	10	10	10	10	10	10	10	10	10	10	10	10	10	10	10	10	10	10	10	10
PVC1%- c6	10	10	10	10	10	10	10	10	10	10	10	10	10	10	10	10	10	10	10	10	10	10
PVC1%- jab1	10	10	10	10	10	10	10	10	10	10	10	10	10	10	10	10	10	10	10	10	10	10
PVC1%- jab2	10	10	10	10	10	10	10	10	10	10	10	10	10	9	9	9	9	9	9	9	8	8
PVC1%- jab3	10	10	10	10	10	10	10	10	10	10	10	10	10	10	10	10	10	10	10	10	10	10
PVC1%- jab4	10	10	10	10	10	10	10	10	10	10	10	10	10	10	10	10	10	10	10	10	10	10
PVC1%- jab5	10	10	10	10	10	10	10	10	10	10	10	10	9	9	9	9	9	9	9	9	9	9
PVC1%- jab6	10	9	9	9	9	9	9	9	9	9	9	9	9	9	9	9	9	9	9	9	9	9
PVC1%- virus1	10	10	10	10	10	7	6	5	2	0	0	0	0	0	0	0	0	0	0	0	0	0
PVC1%- virus2	10	10	10	10	9	8	7	6	6	4	4	2	1	1	1	1	1	1	1	1	1	1
PVC1%- virus3	9	9	9	9	9	8	8	6	4	2	1	0	0	0	0	0	0	0	0	0	0	0
PVC1%- virus4	10	10	10	10	9	8	8	6	4	2	1	1	0	0	0	0	0	0	0	0	0	0
PVC1%- virus5	10	10	10	10	9	7	5	3	3	3	2	2	0	0	0	0	0	0	0	0	0	0
PVC1%- virus6	10	10	10	10	10	8	7	5	4	2	2	1	0	0	0	0	0	0	0	0	0	0
PVC4%- c1	10	10	10	10	10	10	10	10	10	10	10	10	10	10	10	10	10	10	10	10	10	10
PVC4%- c2	10	10	10	10	10	10	10	10	10	10	10	10	10	10	10	10	10	10	10	10	10	10
PVC4%- c3	10	10	10	10	10	10	10	10	10	10	10	10	10	10	10	10	10	10	10	10	10	10
PVC4%- c4	10	10	10	10	10	10	10	10	10	10	10	10	10	10	10	10	10	10	10	10	10	10
PVC4%- c5	10	10	10	10	10	10	10	10	10	10	10	10	10	10	10	10	10	10	10	10	10	10
PVC4%- c6	10	10	10	10	10	10	10	10	10	10	10	10	10	10	10	10	10	10	10	10	10	10
PVC4%- jab1	10	10	10	10	10	10	10	10	10	10	10	10	10	10	10	10	10	10	10	10	10	10
PVC4%- jab2	10	10	10	10	10	10	10	10	10	10	10	10	10	10	10	10	9	9	9	9	9	9
PVC4%- jab3	10	10	10	10	10	10	10	10	10	10	10	10	10	10	10	10	10	10	10	10	10	10
PVC4%- jab4	10	10	10	10	10	10	10	10	10	10	10	10	10	10	10	10	10	10	10	10	10	10
PVC4%- jab5	10	10	10	10	10	10	10	10	10	10	10	10	10	10	10	10	10	10	10	10	10	10
PVC4%- jab6	10	10	10	10	10	10	10	10	10	10	10	10	10	10	10	10	10	10	10	10	10	10
PVC4%- virus1	10	10	10	10	10	9	8	7	3	1	1	0	0	0	0	0	0	0	0	0	0	0
PVC4%- virus2	9	9	9	9	8	7	4	3	0	0	0	0	0	0	0	0	0	0	0	0	0	0
PVC4%- virus3	10	10	10	10	9	8	4	2	2	1	0	0	0	0	0	0	0	0	0	0	0	0
PVC4%- virus4	10	10	10	9	9	7	3	3	0	0	0	0	0	0	0	0	0	0	0	0	0	0
PVC4%- virus5	10	10	10	10	10	9	6	6	5	2	2	0	0	0	0	0	0	0	0	0	0	0
PVC4%- virus6	10	10	10	10	9	6	5	4	0	0	0	0	0	0	0	0	0	0	0	0	0	0
